# Supplementary material for: Diabetes and pregnancy: national trends over a 15 year period
Source: Springer Nature journal article supplement (doi:10.1007/s00125-017-4529-3), 2018-01-10

Electronic supplementary material

Diabetes and pregnancy: National trends over a 15 year period

ESM Fig. 1 Trends in perinatal mortality according to diabetes diagnosis

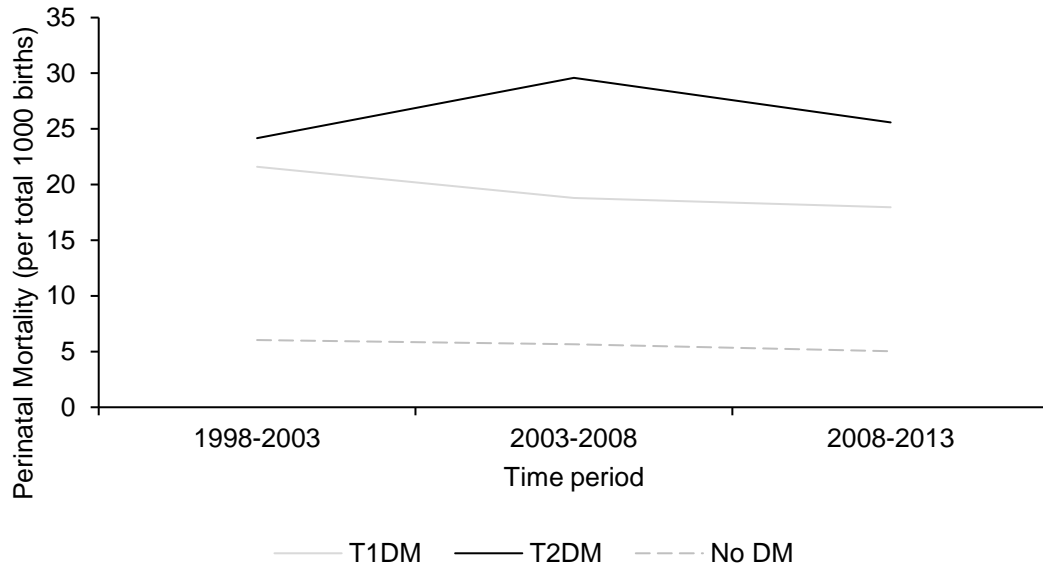

ESM Fig. 2 Trends in maternal age at delivery according to diabetes diagnosis

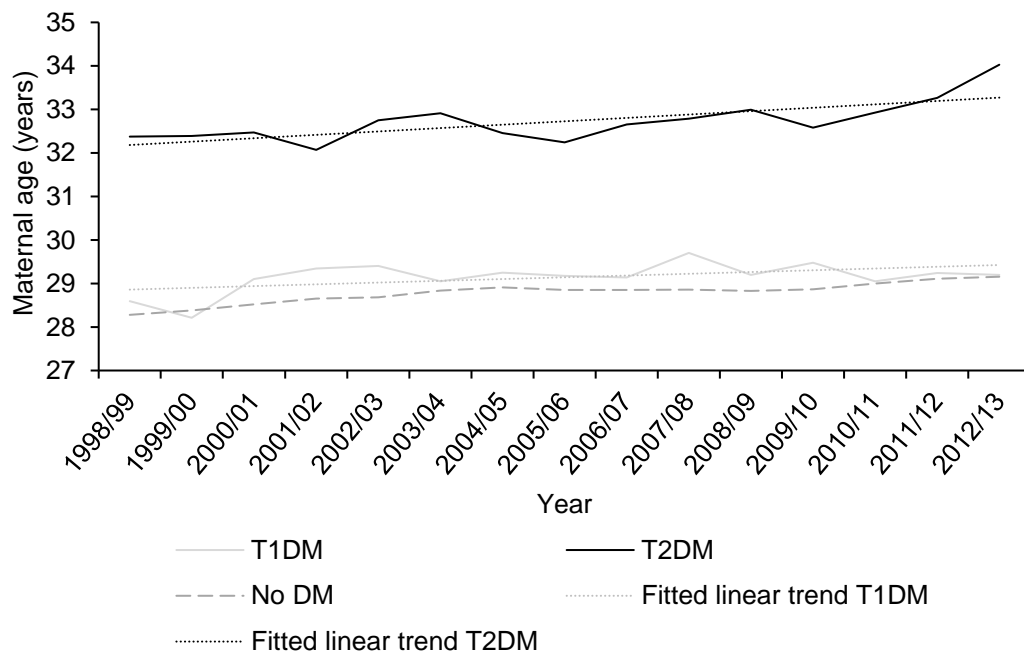

**ESM Fig. 3 Trends in elective caesarean section rates according to diabetes diagnosis**

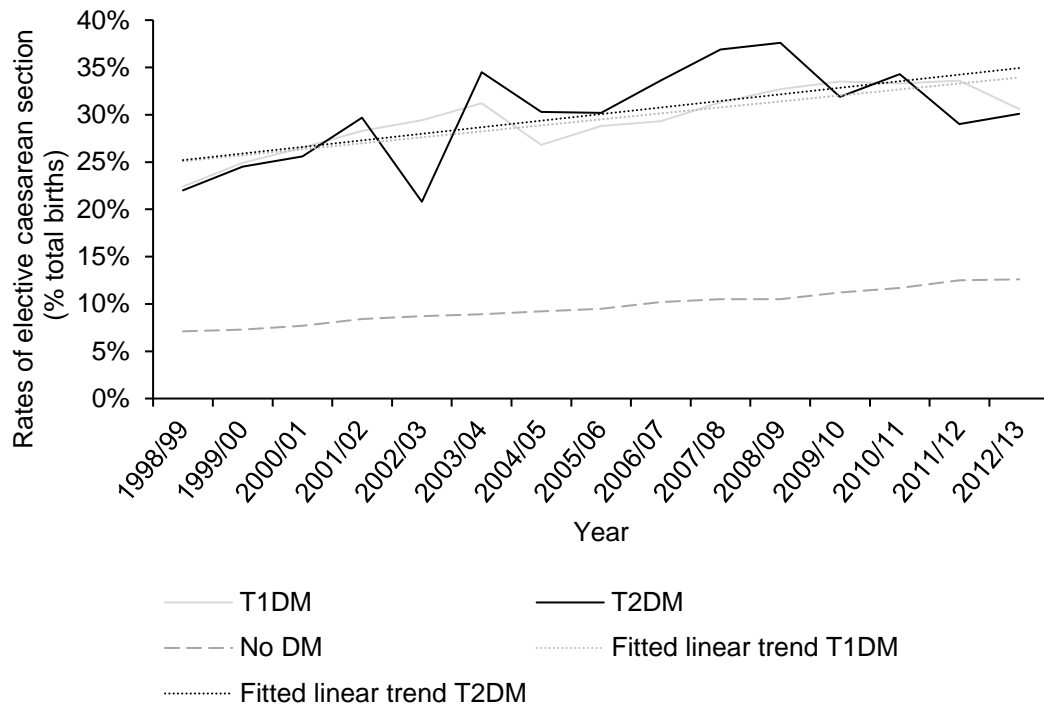

**ESM Fig. 4 Trends in emergency caesarean section rates according to diabetes diagnosis**

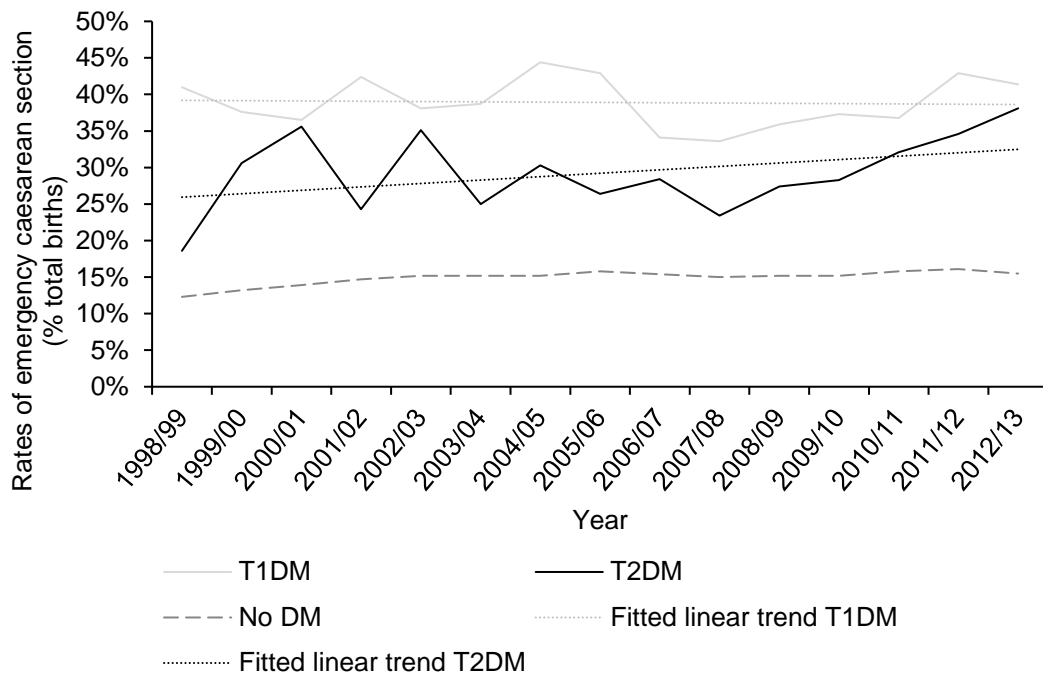

**ESM Fig. 5 Trends in rates of LGA infants according to diabetes diagnosis**

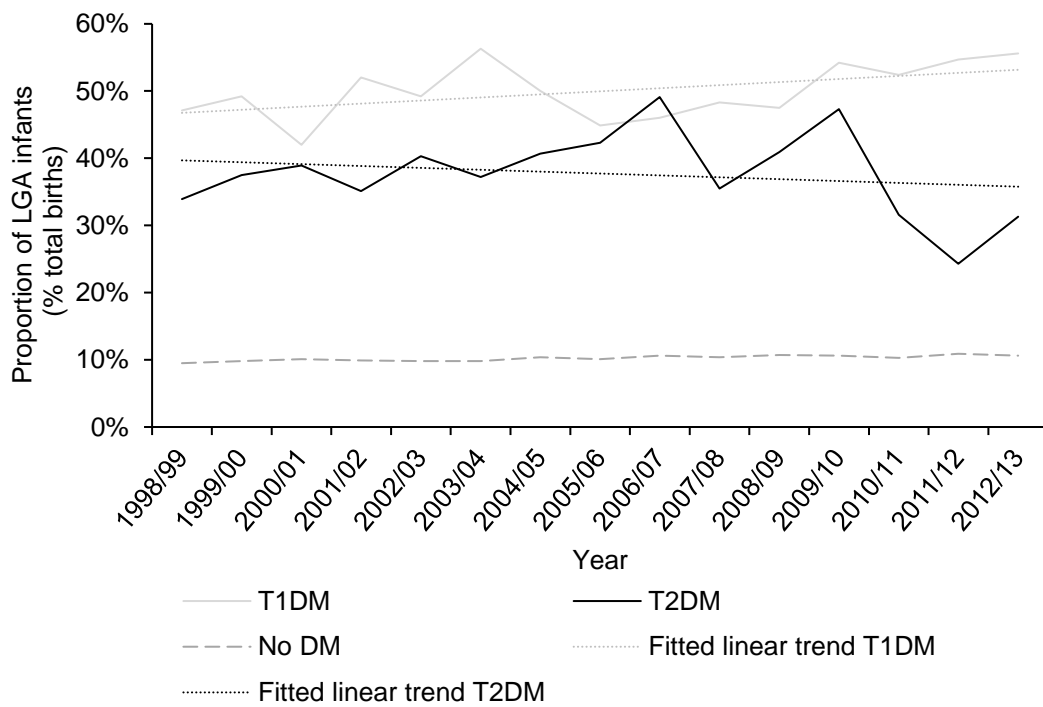

Supplement: MOESM1 [file 15355716]
